# Supplementary material for: Optical, electrical and magnetic properties of lanthanum strontium manganite La1−xSrxMnO3 synthesized through the citrate combustion method
Source: Royal Society of Chemistry journal article supplement (doi:10.1039/c6cp07333f), 2017-01-01
Supplement: c6cp07333f1.pdf [file c6cp07333f1.pdf]

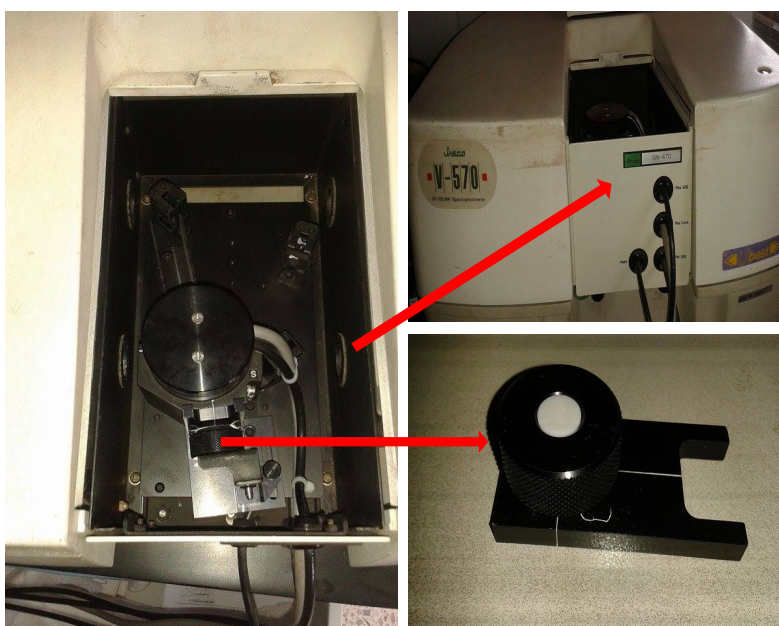

S1: The integrated sphere unit in the UV-Vis-NIR-scanning spectrophotometer (JASCO V-570 spectrophotometer, Japan)

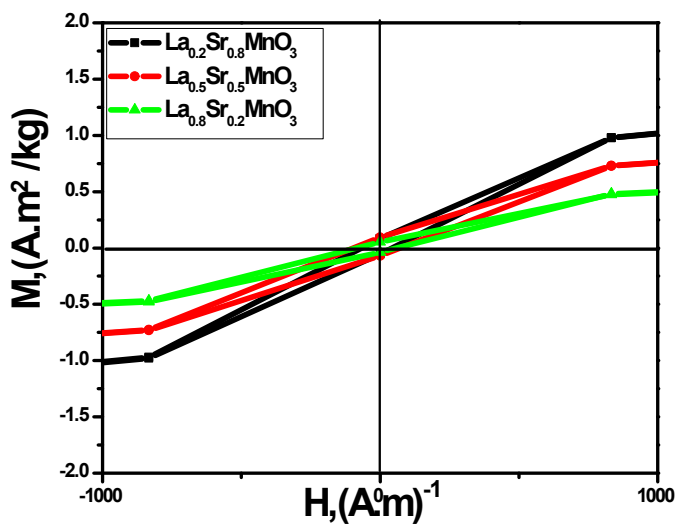

S2. M-H hysteresis curves at Zero value of  $(\text{La}_{1-x}\text{Sr}_x\text{MnO}_3)$  synthesized by organic acid precursor annealed at 1000 °C for 2 h at different  $\text{Sr}^{+2}$  ion molar ratios of 0.2, 0.5 and 0.8
